# Supplementary material
Source: PubMed Central journal article supplement (PMC7698852)
Supplement: Supp_Fig1.pdf [file Supp_Fig1.pdf]

# Supplementary Data

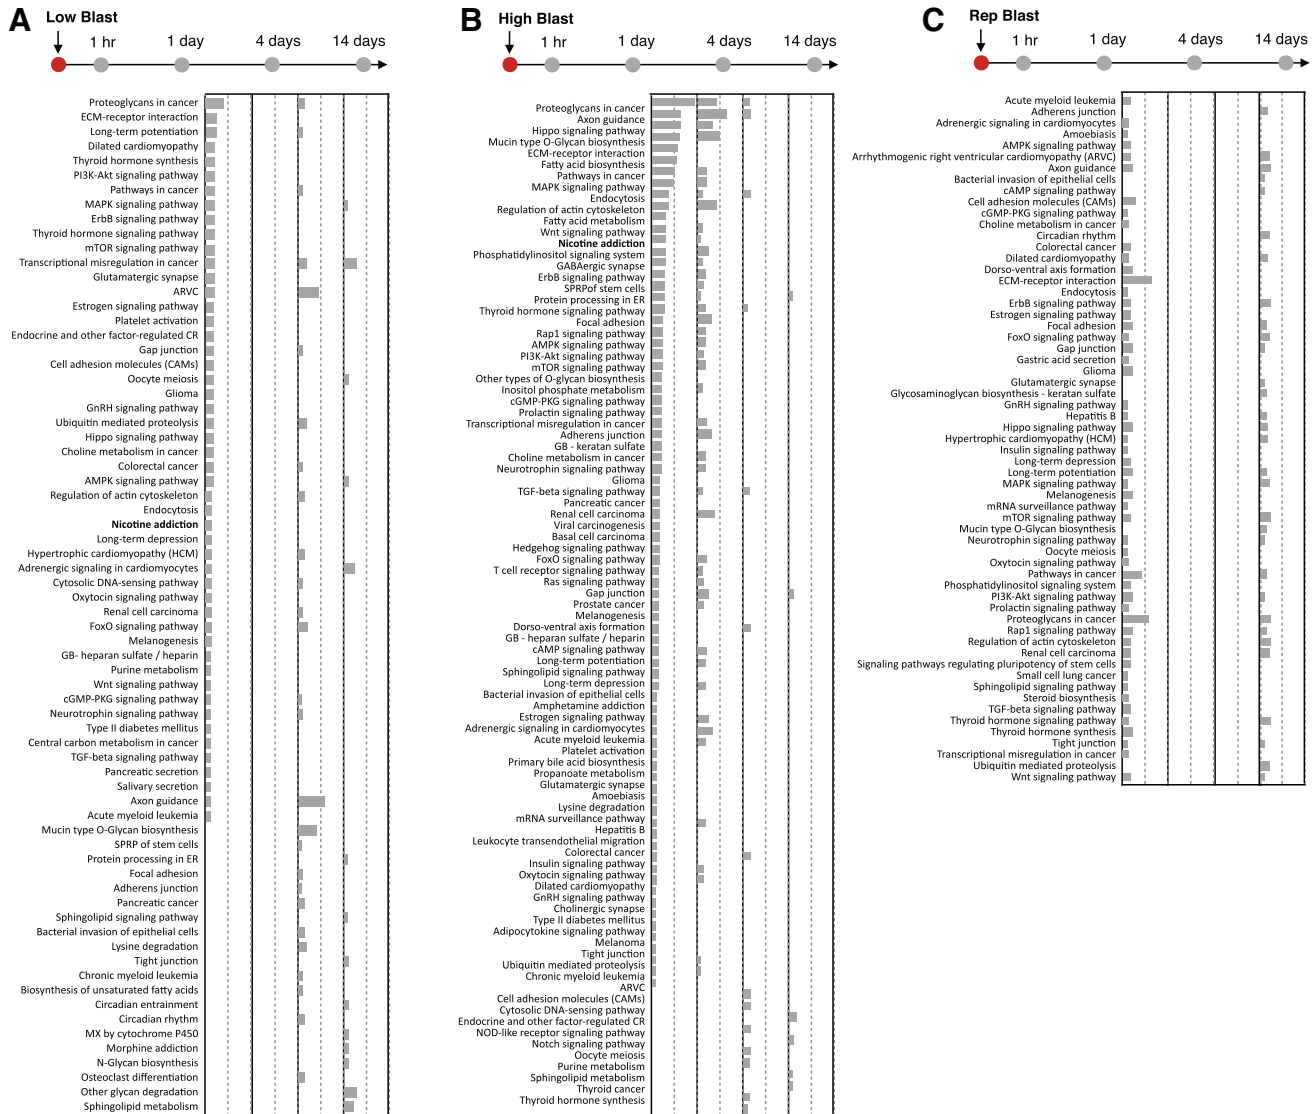

**SUPPLEMENTARY FIG. S1.** Activated pathways at different times elapsed since injury (1 h, 1 day, 4 days, and 14 days) for different injury types and intensities.  $-\log(P)$  was plotted for each pathways and missing bars indicate no activated pathways for that specific injury condition. **(A)** Significantly activated pathways for low blast injury. **(B)** Significantly activated pathways for high blast injury. **(C)** Significantly activated pathways for repetitive blast injury. **(D)** Significantly activated pathways for mild controlled cortical impact (CCI). **(E)** Significantly activated pathways for moderate CCI. **(F)** Significantly activated pathways for repetitive CCI.

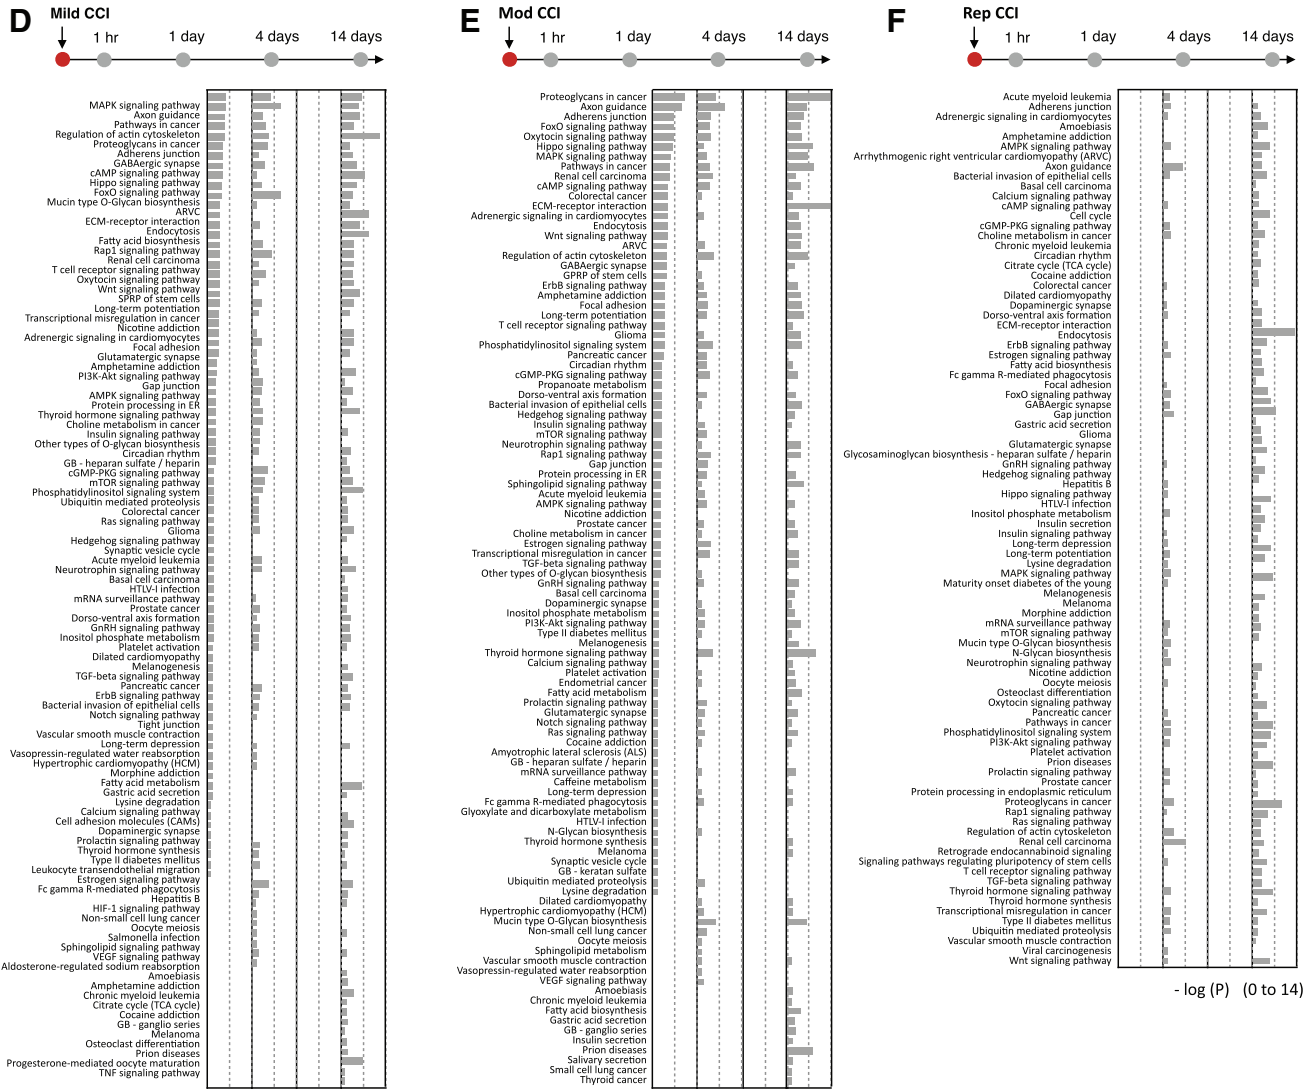

SUPPLEMENTARY FIG. S1. (Continued).
