# Supplementary material
Source: PubMed Central journal article supplement (PMC7698852)
Supplement: Supp_Fig2.pdf [file Supp_Fig2.pdf]

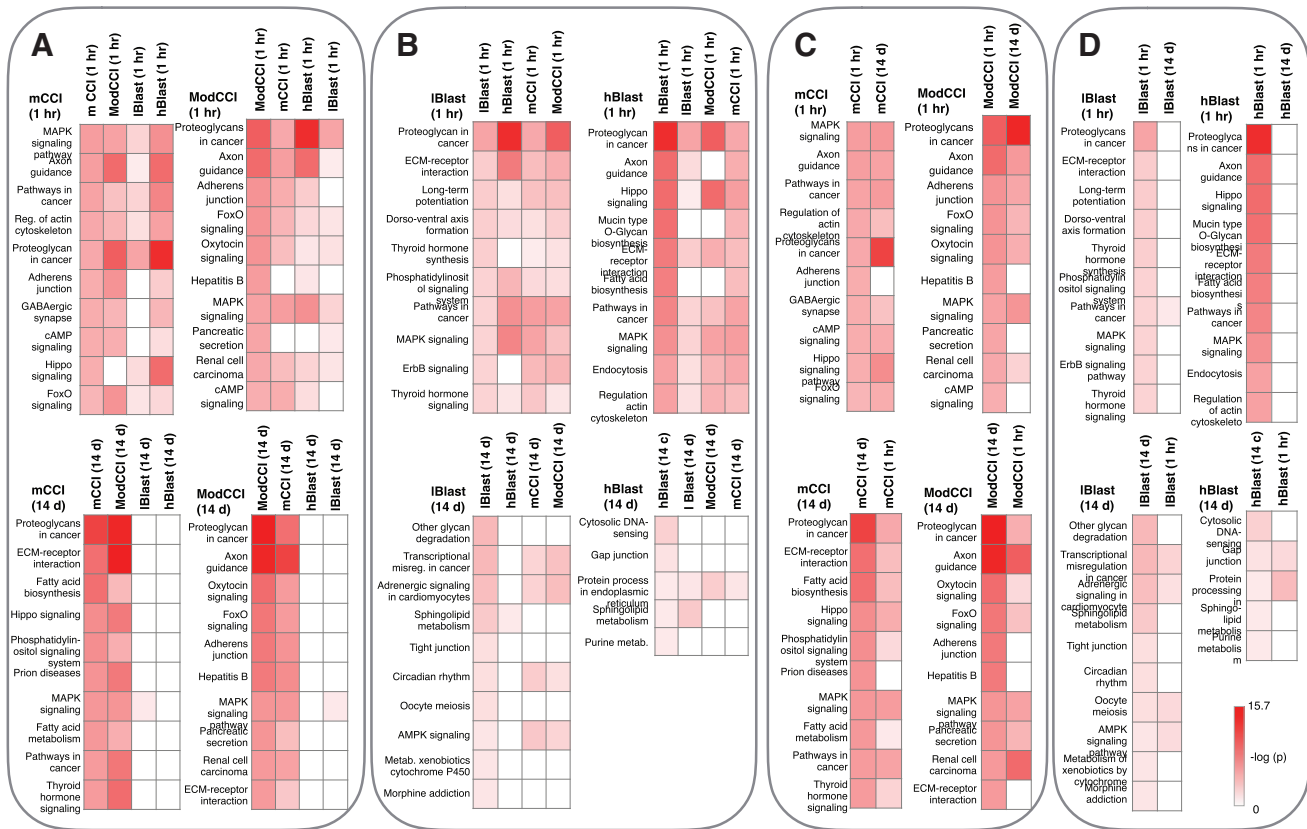

**SUPPLEMENTARY FIG. S2.** Activated signaling pathways in GluR2+ extracellular vesicles (EVs) across different injuries and times elapsed since injury. Pathways were identified in the EV RNA cargo using Kyoto Encyclopedia of Genes and Genomes (KEGG) pathway analysis, and the statistical significance value (adjusted  $p$  value) was negative log-10 base transformed. **(A)** The top 10 pathways in descending order of statistical significance for mild controlled cortical impact (mCCI) and moderate CCI (modCCI) were compared with one another, for both the acute response (1 h) and the persistent response (14 days). **(B)** The top 10 pathways in descending order of statistical significance for low Blast (IBlast) and high Blast (hBlast) were compared with one another, for both the acute response (1 h) and the persistent response (14 days). **(C)** The top 10 pathways in descending order of statistical significance for the acute response (1 h) and the persistent response (14 days) were compared with one another, for both mCCI and modCCI. **(D)** The top 10 pathways in descending order of statistical significance for the acute response (1 h) and the persistent response (14 days) were compared with one another, for both IBlast and hBlast. Less than 10 pathways are shown when there were not 10 pathways with  $p < 0.05$ .
