# Supplementary material
Source: PubMed Central journal article supplement (PMC7698852)
Supplement: Supp_Fig3.pdf [file Supp_Fig3.pdf]

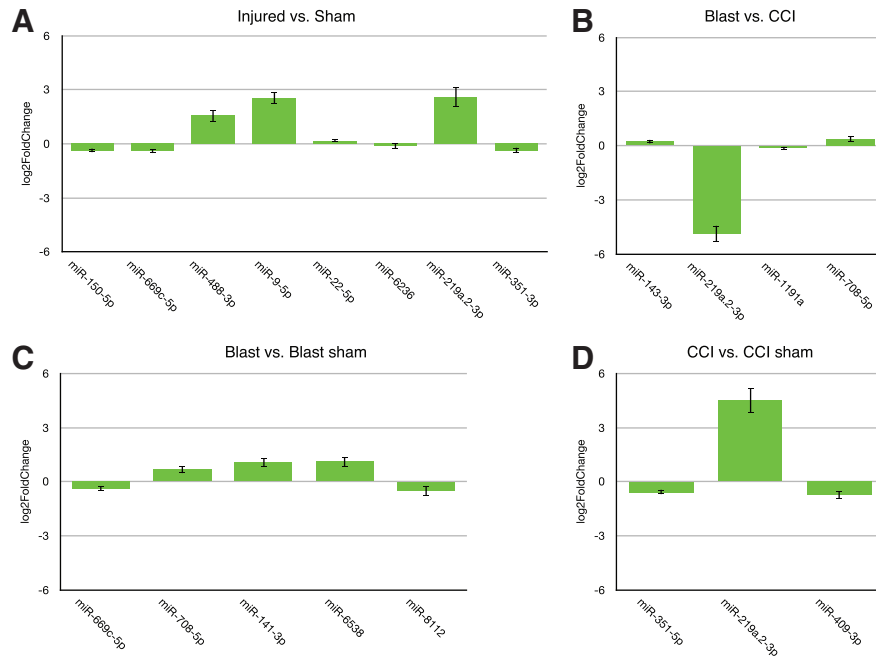

**SUPPLEMENTARY FIG. S3.** Log2FoldChange for microRNA (miRNA) biomarkers that were used for machine learning based analysis. Error bars represent standard error. **(A)** Fold change (injured vs. sham) of the eight miRNAs identified for injured vs. sham classification. **(B)** Fold change (Blast vs. CCI) of the four miRNAs identified for Blast vs. CCI classification. **(C)** Fold change (Blast vs. Blast sham) of the five miRNAs were identified for Blast vs. Blast sham classification. **(D)** Fold change (CCI vs. CCI sham) of the three miRNAs identified for CCI vs. CCI sham classification.
