# Supplementary material
Source: PubMed Central journal article supplement (PMC7698852)
Supplement: Supp_Fig4.pdf [file Supp_Fig4.pdf]

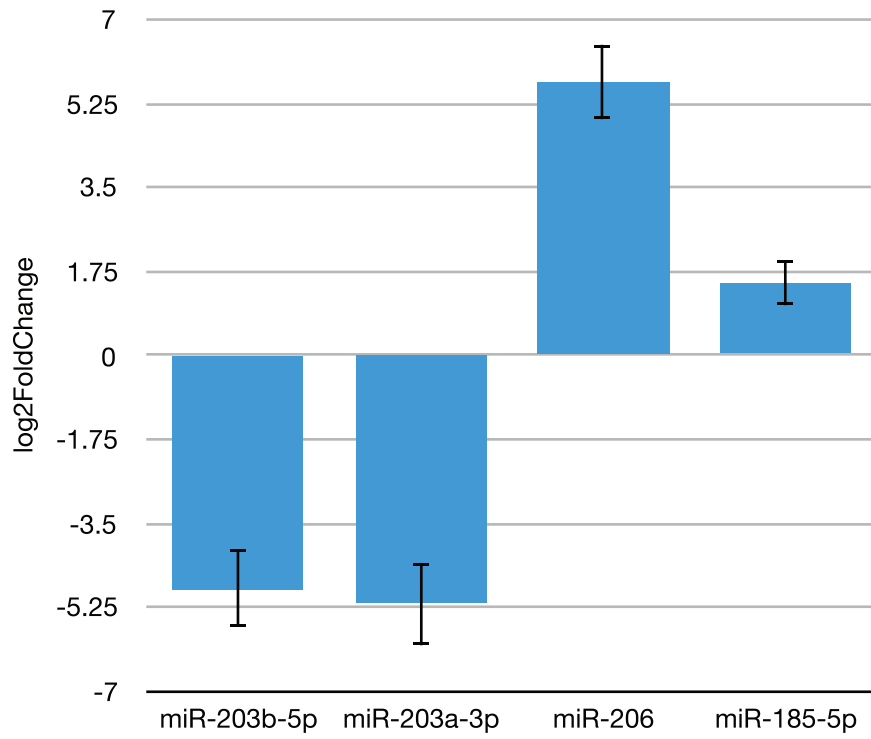

**SUPPLEMENTARY FIG. S4.** Log2FoldChange (TBI patients vs. Control) for four miRNA biomarkers that were used for machine learning based analysis. Error bars represent log fold standard error.
